# Supplementary material for: Facile synthesis of nanostructured Ni/NiO/N-doped graphene electrocatalysts for enhanced oxygen evolution reaction
Source: Royal Society of Chemistry journal article supplement (doi:10.1039/d4na00141a), 2024-01-01
Supplement: d4na00141a1.pdf [file d4na00141a1.pdf]

## Electronic Supporting Information

### **Facile Synthesis of Nanostructured Ni/NiO/N-doped Graphene Electrocatalysts for Enhanced Oxygen Evolution Reaction**

*M. Roshni<sup>#a</sup>, Avit Bhogilal Patel<sup>b</sup>, C. P. Vinod,<sup>c</sup> Ritu Gupta<sup>b,d</sup> and D. Jagadeesan<sup>a\*</sup>*

*<sup>a</sup>Department of Chemistry, Indian Institute of Technology Palakkad, Kerala, India*

*<sup>b</sup>Department of Chemistry, Indian Institute of Technology Jodhpur, Jodhpur 342037, India*

*<sup>c</sup>Catalysis and Inorganic Chemistry Division, CSIR-National Chemical Laboratory, Pune 411008, India; Academy of Scientific and Innovative Research (AcSIR), Ghaziabad 201002, India.*

*<sup>d</sup>Department of Chemistry, Indian Institute of Technology Delhi, Delhi 110016, India*

*Corresponding Author (Email: [d.jagadeesan@iitpkd.ac.in](mailto:d.jagadeesan@iitpkd.ac.in))*

#### **S1 Preparation of Nickel oxide nanoparticles**

160 mg of CTAB was dissolved in 6 mL of distilled water in a 100 mL beaker. D-glucose (1.2 g) was added to the clear solution and sonicated for 4 min. 0.6 g of nickel nitrate was added and sonicated for 5 min, forming a light green clear solution, then heated at 413 K until the foam was produced and stabilized (within 60-70 min). The beaker was kept in an ice bath for 30 minutes and held at room temperature for another 30 min. It was followed by carbonization at 453 K for about 6 h and calcination at 923 K for 5 h in a muffle furnace. As prepared catalysts are hereafter denoted as NiF. It was used as the substrate in the CVD for graphene growth.

**Video S1:** Video of the OER reaction showing the rigorous oxygen evolution from the NiFL electrode at 20 mA/cm<sup>2</sup>

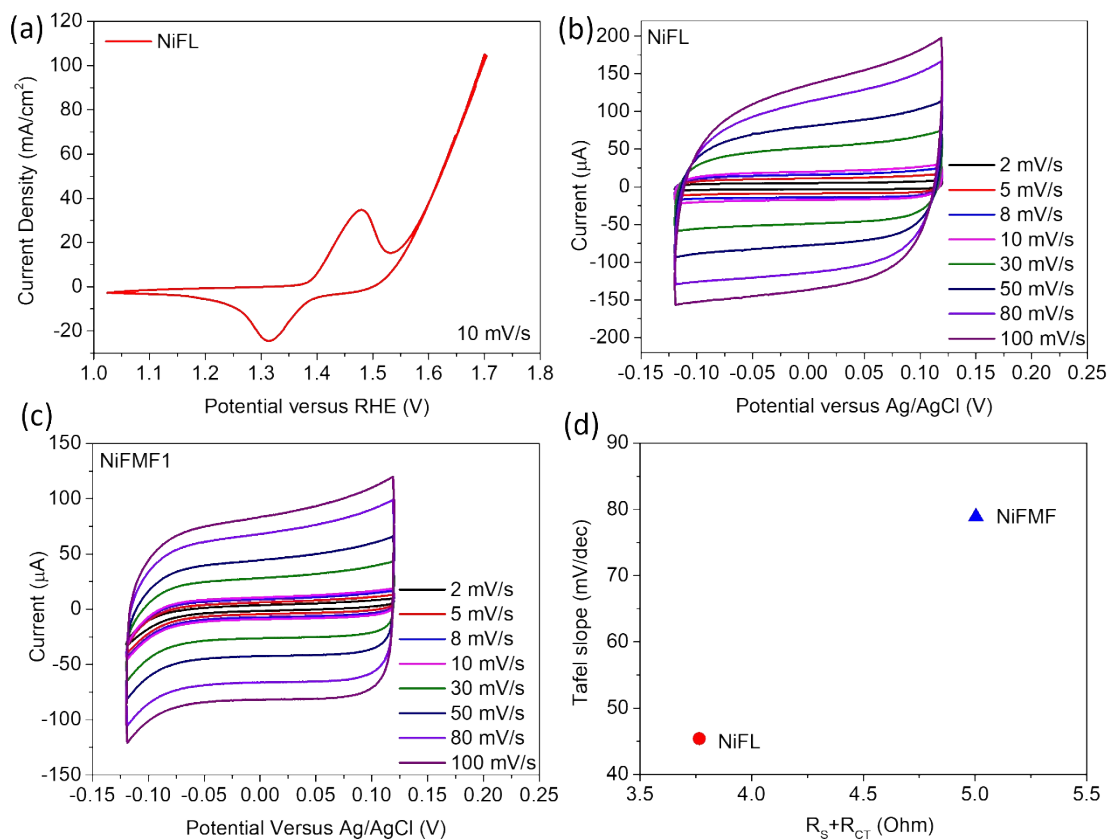

**Figure S1:** (a) CV curve of NiFL at 10 mV/s in 1 M KOH, CV in the non-faradic region for (b) NiFL (c) NiFMF at different scan rates ranging between 2-100 mV/s, (d) Tafel slope versus total resistance for the studied materials.

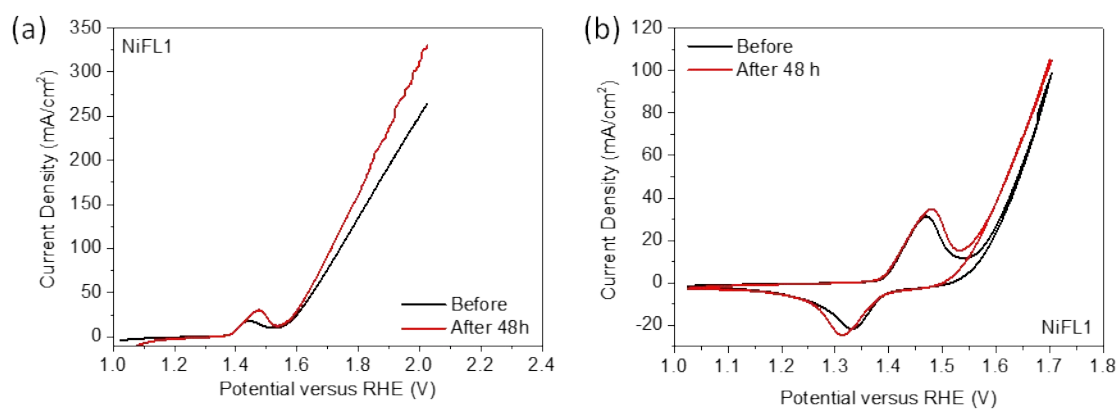

**Figure S2:** The (a) LSV and (b) CV measurements at 10 mV/s recorded during the stability studies for NiFL1 before and after 48 h of testing.

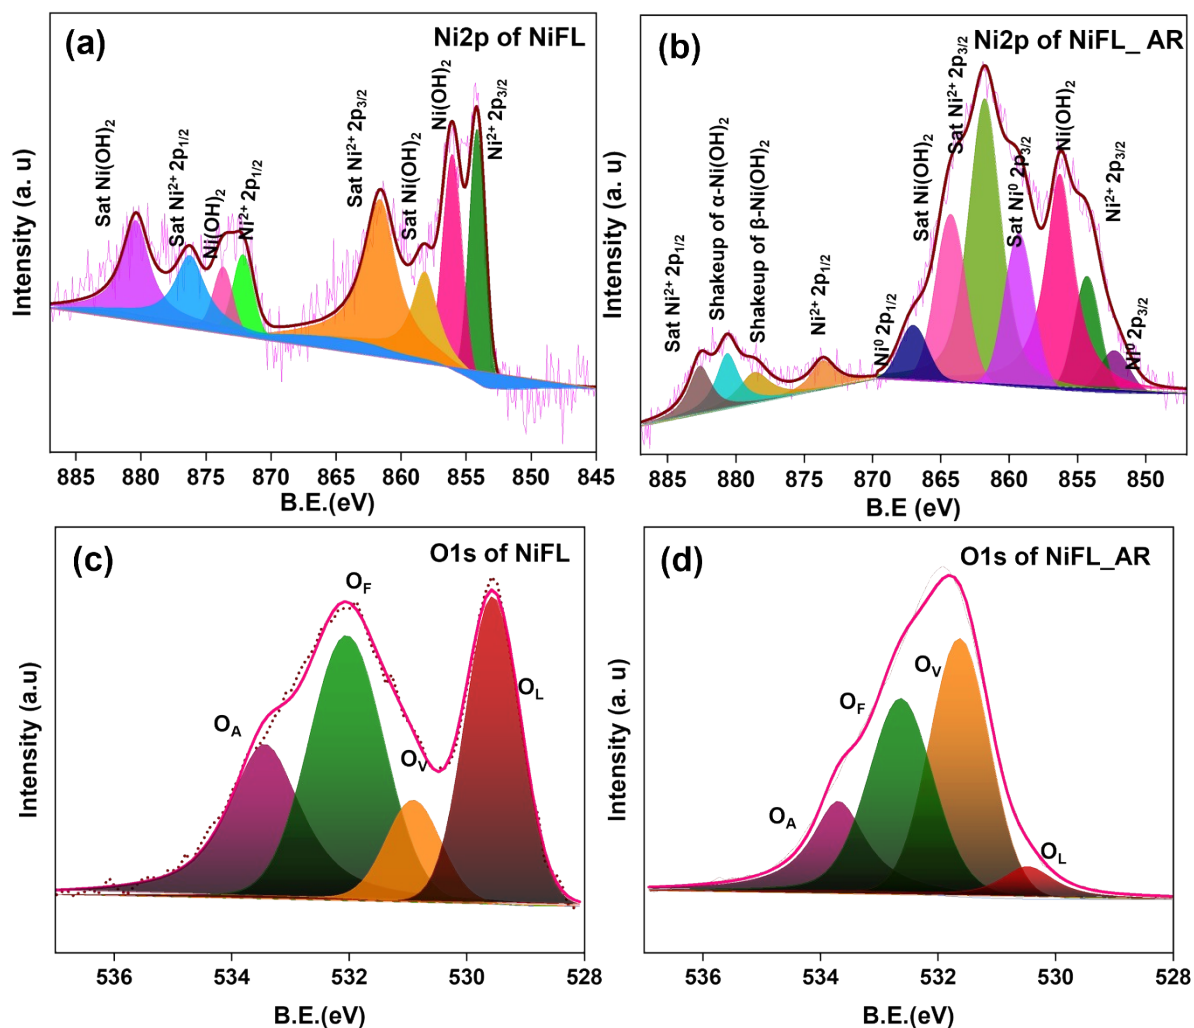

**Figure S3:** The deconvoluted XPS spectra of Ni2p (panel a) and O1s (panel c) of freshly prepared NiFL. Deconvoluted XPS spectra of Ni2p (panel b) and O1s (panel d) of NiFL after 48 h.

**Table S1:** Comparison of B.E. values of Ni 2p for catalysts of similar composites

| Sl no | Material                                          | B. E of $\text{Ni}^{2+}2p_{3/2}(\text{NiO})$ | B. E of $\text{Ni}^{2+}2p_{3/2}(\text{NiO})$ | B. E of $\text{Ni}^{2+}2p_{1/2}(\text{NiO})$ | Reference |
|-------|---------------------------------------------------|----------------------------------------------|----------------------------------------------|----------------------------------------------|-----------|
| 1     | NiO                                               | 853.7                                        | 855.4                                        | 864                                          | 1         |
| 2     | Ni/NiO                                            | 853.6                                        | 855.4                                        | 871.1                                        | 2         |
| 3     | Ni/NiO/N-doped activated carbon                   | 854                                          | 855.8                                        | 871.5                                        | 3         |
| 4     | Ni @ NiO/N-C nanowires                            | 854.5                                        | 855.9                                        | 871.7                                        | 4         |
| 5     | Ni-NiO@3-Dimensional hierarchical porous graphene | 854.8                                        | 856.6                                        | 874.1                                        | 5         |
| 6     | Ni/NiO/N-doped graphene                           | 854.6                                        | 856.2                                        | 872.6                                        | This work |

## References

1. M. C. Biesinger, B. P. Payne, A. P. Grosvenor, L. WM Lau, A. R. Gerson, and R. St C. Smart, *Appl. Surf. Sci.*, 2011, 257, 2717, DOI: [10.1016/j.apsusc.2010.10.051](https://doi.org/10.1016/j.apsusc.2010.10.051).

2. N. Srinivasa, J. P. Hughes, P. S. Adarakatti, C. Manjunatha, S. J. Rowley-Neale, S. Ashoka, and C. E. Banks, *RSC adv.*, 2021, 11, 14654, DOI: **10.1039/D0RA10597J**
3. K. N. Dinh, and V. G. Gomes, *Carbon*, 2020, **157**, 515, DOI: **10.1016/j.carbon.2019.09.080**.
4. A. Xie, J. Zhang, X. Tao, J. Zhang, B. Wei, W. Peng, Y. Tao, and S. Luo, *Electrochim. Acta*, 2019, 324, 134814, DOI: **10.1016/j.electacta.2019.134814**.
5. N. Ullah, W.T. Zhao, X.Q. Lu, C.J. Oluigbo, S.A. Shah, M.M. Zhang, J.M. Xie, Y. Xu, *Electrochim, Acta*, 2019, 298, 163, DOI: **10.1016/j.electacta.2018.12.053**.
